# Supplementary material for: Theoretical Study of Cellulose II Nanocrystals with Different Exposed Facets
Source: Research Square preprint supplement (doi:10.21203/rs.3.rs-228153/v1), 2021-02-17
Supplement: Supplementary file 1 [file c06025c25861abe8f89592c0.pdf]

# Theoretical Study of Cellulose II Nanocrystals with Different Exposed Facets

Can Leng<sup>1,2,3</sup>, Kenli Li<sup>3,4</sup>, Zean Tian<sup>4\*</sup>, Yubing Si<sup>5\*\*</sup>, Huang Huang<sup>3</sup>, Junfeng Li<sup>6</sup>, Jie Liu<sup>1,2</sup>, Wei-Qing Huang<sup>7</sup>, and Keqin Li<sup>4,8\*\*\*</sup>

<sup>1</sup>Science and Technology on Parallel and Distributed Processing Laboratory, National University of Defense Technology, Changsha 410073, China

<sup>2</sup>Laboratory of Software Engineering for Complex Systems, National University of Defense Technology, Changsha 410073, China

<sup>3</sup>National Supercomputer Center in Changsha, 410082, China

<sup>4</sup>College of Computer Science and Electronic Engineering, Hunan University, Changsha 410082, China

<sup>5</sup>College of Chemistry, Zhengzhou University, Zhengzhou, 450001, China

<sup>6</sup>College of Chemistry and Chemical Engineering, and Henan Key Laboratory of Function-Oriented Porous Materials, Luoyang Normal University, 471934 Luoyang, China

<sup>7</sup>Department of Applied Physics, School of Physics and Electronics, Hunan University, Changsha 410082, China

<sup>8</sup>Department of Computer Science, State University of New York, New Paltz, New York 12561, USA

\*tianzean@hnu.edu.cn

\*\*ybsi@zzu.edu.cn

\*\*\*lik@newpaltz.edu

## Supplementary Materials:

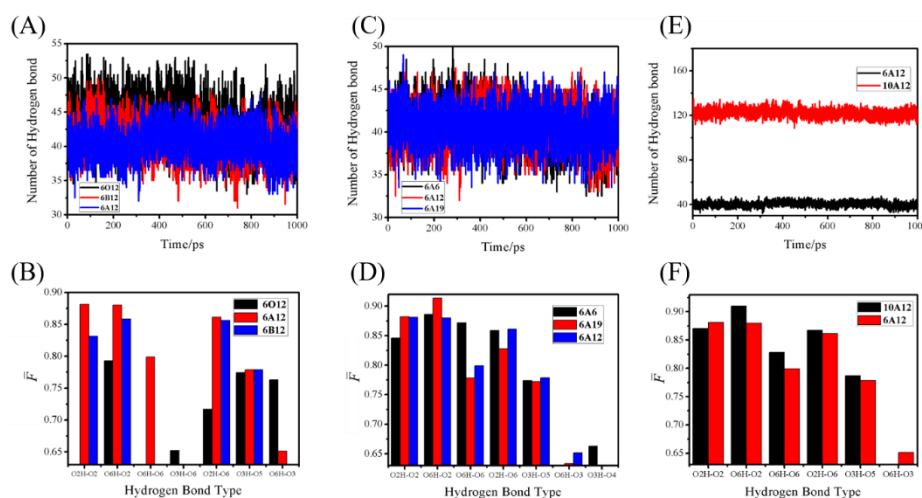

**Supplementary Figure S1. The number and average fraction  $\bar{F}$  of hydrogen bonds in the cellulose II nanocrystal models at the terminal anhydroglucose.** (A) and (B) are the number and  $\bar{F}$  of hydrogen bonds in 6O12, 6A12 and 6B12 of the terminal anhydroglucose, respectively; (C) and (D) are the number and  $\bar{F}$  of hydrogen bonds in 6A6, 6A12 and 6A19 models of the terminal anhydroglucose, respectively; (E) and (F) are the number and  $\bar{F}$  of hydrogen bonds in 6A12 and 10A12 of the terminal anhydroglucose, respectively.

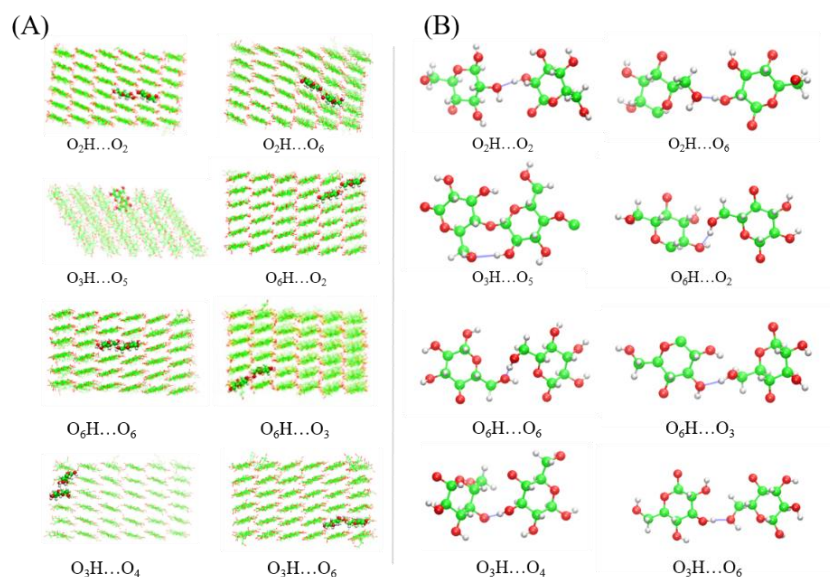

**Supplementary Figure S2. The ONIOM models and the hydrogen bonds scheme.** (A) The ONIOM models in which all hydrogen bond types are in their highest fraction samples; (B) The hydrogen bonds are colored with the blue dash line in cellulose II models.

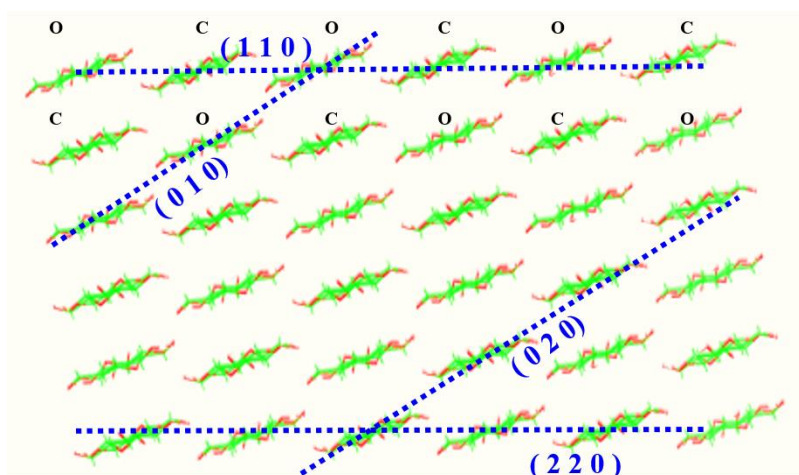

**Supplementary Figure S3. The 3×cello-tetramer chain sheet models derived from the original nanocrystal models of cellulose II.** O refers to the origin chain, C refers to the center chain. The (0 1 0), (0 2 0) and (1 1 0), (2 2 0) crystal plane are selected with a 3×cello-tetramer chain sheet in both O-C-O, C-O-C types.

**Supplementary Table S1. The average hydrogen bond analysis in six types of cellulose II nanocrystal models.** The type, average fraction  $\bar{F}$  of HBs at the terminal residues, the average O...O distance (AvgDist) and angle (AvgAng) of HB type of the six nanocrystal models.

| Models | Type                              | $\bar{F}$ | AvgDist/Å | AvgAng/° |
|--------|-----------------------------------|-----------|-----------|----------|
| 6A6    | O <sub>2</sub> H...O <sub>2</sub> | 0.846     | 2.766     | 162.257  |
|        | O <sub>6</sub> H...O <sub>2</sub> | 0.886     | 2.756     | 160.932  |
|        | O <sub>6</sub> H...O <sub>6</sub> | 0.872     | 2.777     | 162.457  |
|        | O <sub>2</sub> H...O <sub>6</sub> | 0.859     | 2.769     | 160.015  |
|        | O <sub>3</sub> H...O <sub>5</sub> | 0.774     | 2.756     | 156.305  |
|        | O <sub>3</sub> H...O <sub>4</sub> | 0.663     | 2.771     | 160.359  |
| 6A12   | O <sub>2</sub> H...O <sub>2</sub> | 0.881     | 2.764     | 162.561  |
|        | O <sub>6</sub> H...O <sub>2</sub> | 0.880     | 2.755     | 160.982  |
|        | O <sub>6</sub> H...O <sub>6</sub> | 0.799     | 2.782     | 162.645  |
|        | O <sub>2</sub> H...O <sub>6</sub> | 0.861     | 2.769     | 159.775  |
|        | O <sub>3</sub> H...O <sub>5</sub> | 0.779     | 2.752     | 155.918  |
|        | O <sub>6</sub> H...O <sub>3</sub> | 0.652     | 2.761     | 161.520  |
| 6A19   | O <sub>2</sub> H...O <sub>2</sub> | 0.882     | 2.763     | 162.709  |
|        | O <sub>6</sub> H...O <sub>2</sub> | 0.914     | 2.751     | 161.521  |
|        | O <sub>6</sub> H...O <sub>6</sub> | 0.779     | 2.777     | 162.669  |
|        | O <sub>2</sub> H...O <sub>6</sub> | 0.828     | 2.767     | 159.719  |
|        | O <sub>3</sub> H...O <sub>5</sub> | 0.772     | 2.746     | 155.479  |
|        | O <sub>6</sub> H...O <sub>3</sub> | 0.634     | 2.804     | 159.806  |
| 10A12  | O <sub>2</sub> H...O <sub>2</sub> | 0.871     | 2.764     | 162.392  |
|        | O <sub>6</sub> H...O <sub>2</sub> | 0.910     | 2.754     | 161.209  |
|        | O <sub>6</sub> H...O <sub>6</sub> | 0.828     | 2.776     | 162.800  |
|        | O <sub>2</sub> H...O <sub>6</sub> | 0.867     | 2.765     | 159.811  |
|        | O <sub>3</sub> H...O <sub>5</sub> | 0.787     | 2.750     | 155.662  |
| 6B12   | O <sub>2</sub> H...O <sub>2</sub> | 0.831     | 2.769     | 162.068  |
|        | O <sub>6</sub> H...O <sub>2</sub> | 0.858     | 2.758     | 160.197  |
|        | O <sub>2</sub> H...O <sub>6</sub> | 0.856     | 2.768     | 160.909  |
|        | O <sub>3</sub> H...O <sub>5</sub> | 0.779     | 2.763     | 156.275  |
| 6O12   | O <sub>6</sub> H...O <sub>2</sub> | 0.793     | 2.757     | 161.494  |
|        | O <sub>3</sub> H...O <sub>6</sub> | 0.652     | 2.798     | 158.006  |
|        | O <sub>2</sub> H...O <sub>6</sub> | 0.717     | 2.791     | 157.030  |
|        | O <sub>3</sub> H...O <sub>5</sub> | 0.774     | 2.768     | 155.736  |
|        | O <sub>6</sub> H...O <sub>3</sub> | 0.763     | 2.740     | 159.833  |

**Supplementary Table S2.** Hydrogen bond type in different cellulose II nanocrystal models.

|                                   | 6A6 | 6A12 | 6A19 | 10A12 | 6B12 | 6O12 |
|-----------------------------------|-----|------|------|-------|------|------|
| O <sub>2</sub> H...O <sub>2</sub> | ●   | ●    | ●    | ●     | ●    |      |
| O <sub>2</sub> H...O <sub>6</sub> | ●   | ●    | ●    | ●     | ●    | ●    |
| O <sub>3</sub> H...O <sub>5</sub> | ●   | ●    | ●    | ●     | ●    | ●    |
| O <sub>6</sub> H...O <sub>2</sub> | ●   | ●    | ●    | ●     | ●    | ●    |
| O <sub>6</sub> H...O <sub>6</sub> | ●   | ●    | ●    | ●     |      |      |
| O <sub>6</sub> H...O <sub>3</sub> |     | ●    | ●    |       |      | ●    |
| O <sub>3</sub> H...O <sub>4</sub> | ●   |      |      |       |      |      |
| O <sub>3</sub> H...O <sub>6</sub> |     |      |      |       |      | ●    |
